# Supplementary figures and images for: Deep learning insights into the architecture of the mammalian egg-sperm fusion synapse
Source: eLife journal article supplement (doi:10.7554/elife.93131), 2024-01-04

**Figure 1, left**

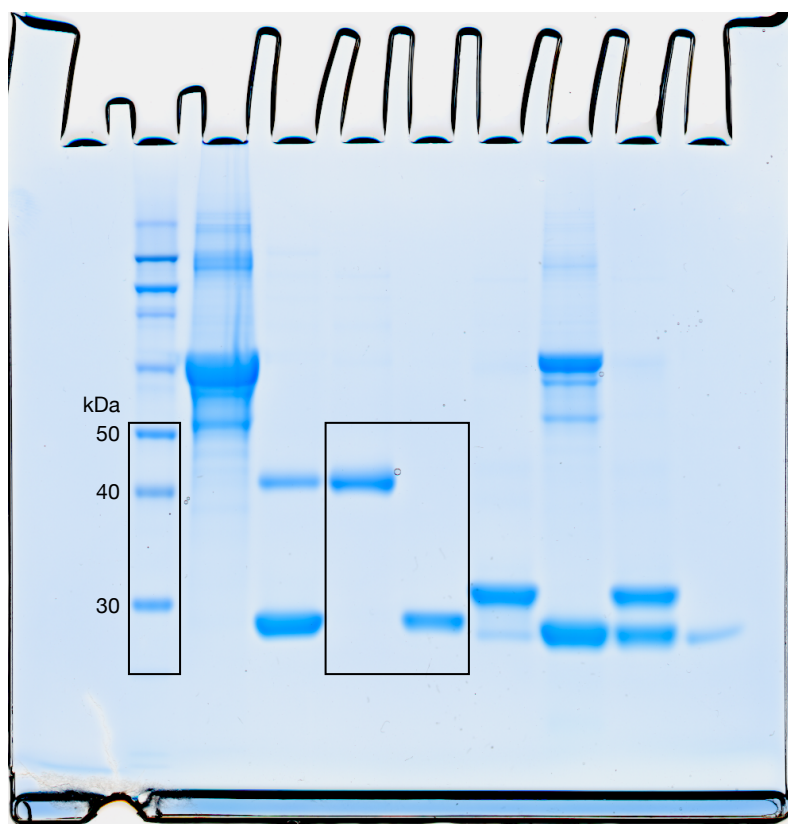

**Figure 1, right**

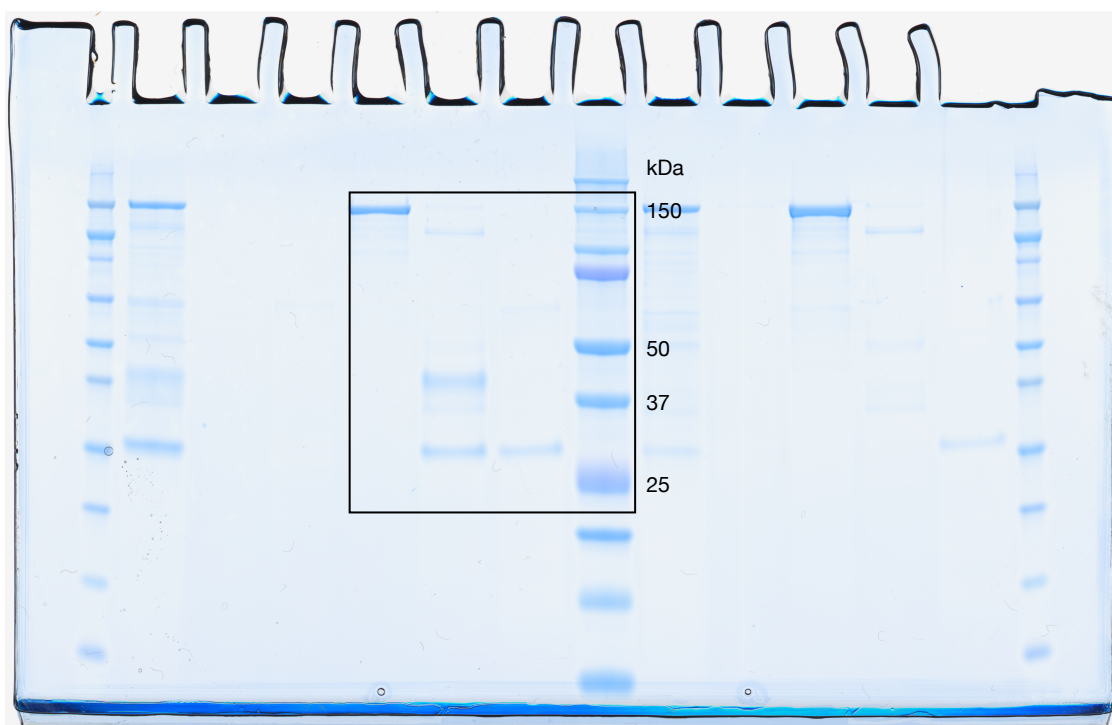

Supplement: fig1-data1 [file elife-93131-fig1-data1-v1.zip]

Figure 1-Figure Supplement 1, left

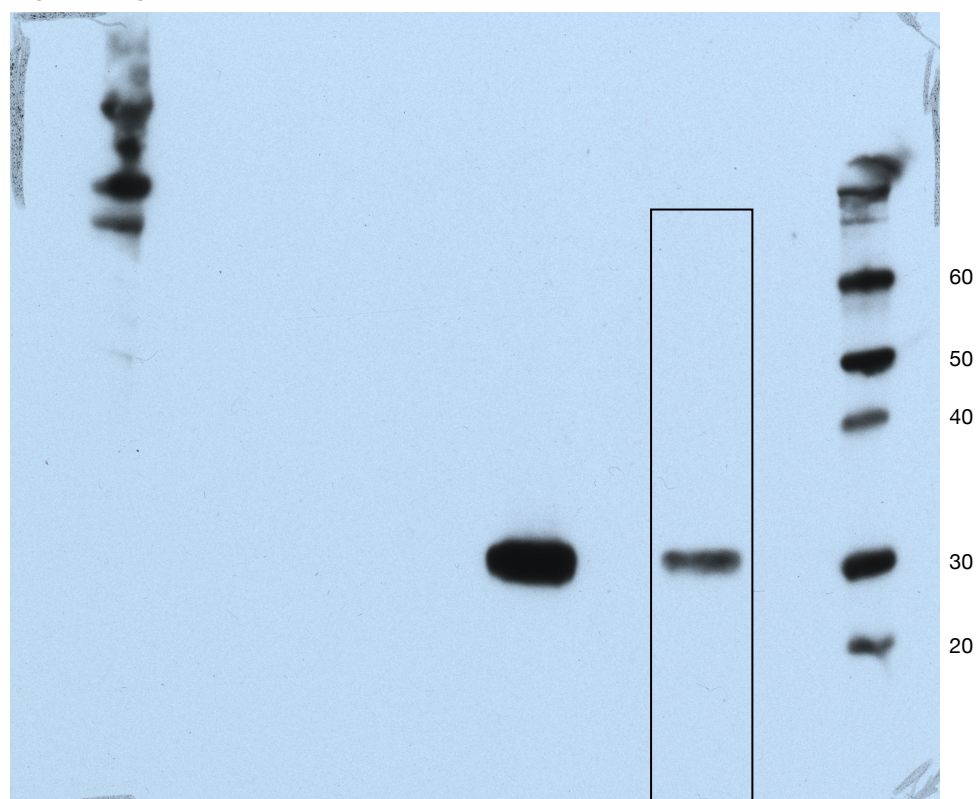

Figure 1-Figure Supplement 1, right

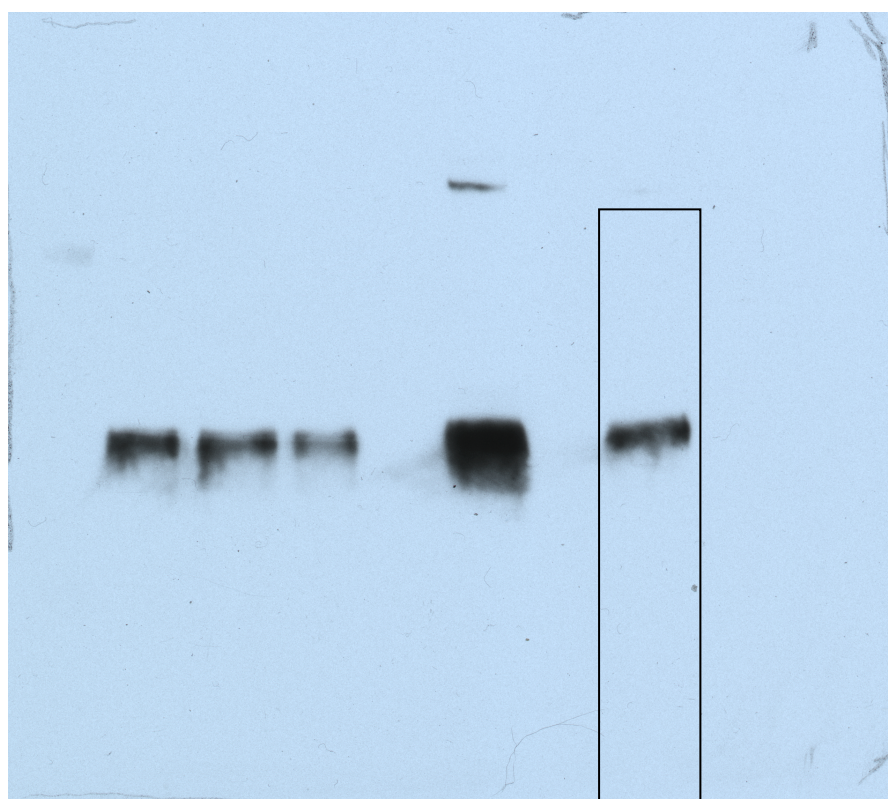

Supplement: fig1-figsupp1-data1 [file Figure S1–Source Data Labelled.pdf › eLife-VOR-RA-2023-93131R1_figure_1-figure_supplement_1/Figure S1–Source Data Labelled.pdf]
